# Supplementary material for: Abyssal plain hills and internal wave turbulence
Source: Copernicus journal article supplement (doi:10.5194/bg-2018-142), 2018-04-04
Supplement: Supplementary file [file bg-2018-142-AC2-supplement.pdf]

1  
2  
3  
4  
5  
6  
7  
8  
9  
10  
11  
12  
13  
14  
15  
16  
17  
18  
19  
20  
21  
22  
23  
24  
25  
26  
27  
28  
29  
30  
31  
32  
33  
34  
35  
36

# **Abyssal plain hills and internal wave turbulence**

**by Hans van Haren<sup>1</sup>**

<sup>1</sup>Royal Netherlands Institute for Sea Research (NIOZ) and Utrecht University, P.O. Box 59,  
1790 AB Den Burg, the Netherlands.  
\*e-mail: [hans.van.haren@nioz.nl](mailto:hans.van.haren@nioz.nl)

37 **Abstract.**

38 A 400-m long array with 201 high-resolution NIOZ temperature sensors was  
39 deployed above a northeast-equatorial Pacific hilly abyssal plain for 2.5 months. The  
40 sensors sampled at 1 Hz, the lowest was at 7 m above the bottom 'mab'. The aim was  
41 to study internal waves and turbulent overturning away from large-scale ocean  
42 topography. Topography consisted of moderate, a few 100 m elevated hills, providing  
43 a mean bottom slope of one-third of that found at the Mid-Atlantic Ridge (on 2 km  
44 horizontal scales). In contrast with observations over large-scale topography like  
45 guyots, ridges and continental slopes, the present data showed a well-defined near-  
46 homogeneous 'bottom-boundary layer'. However, its thickness varied strongly with  
47 time extending between <7 and 100 mab with a mean~~maximum~~ around 65 mab. The  
48 average thickness exceeded tidal current bottom-frictional heights so that~~and~~ internal  
49 wave breaking dominated over bottom friction. Near-bottom fronts also varied in time  
50 (and thus space). Occasional coupling was observed between the interior internal waves  
51 breaking and the near-bottom overturning, with varying up- and down- phase  
52 propagation. In contrast with currents that were dominated by the semidiurnal tide, 200-  
53 m shear was dominant at (sub-)inertial frequencies. The shear was so large that it  
54 provided a background of marginal stability for the straining high-frequency internal  
55 wave field in the interior. Daily averaged turbulence dissipation rate estimates were  
56 between  $10^{-10}$  and  $10^{-9} \text{ m}^2\text{s}^{-3}$ , increasing with depth, while eddy diffusivities were  $O(10^{-4} \text{ m}^2\text{s}^{-1})$ . This most intense 'near-bottom' internal wave-induced turbulence will affect  
58 resuspension of sediments.

59

60

## 61 **1 Introduction**

62 The mechanical kinetic energy brought into the ocean via tides, atmospheric  
63 disturbances and the Earth's rotation governs the motions in the density stratified ocean  
64 interior. On the one hand isopycnals are set into oscillating motions as 'internal waves'.  
65 On the other hand these oscillating motions deform nonlinearly and eventually  
66 irreversibly lose their energy into turbulent mixing: Breaking internal waves are  
67 suggested to be the dominant source of turbulence in the ocean (e.g., Eriksen, 1982;  
68 Gregg, 1989; Thorpe, 2018). This turbulence is vital for life in the ocean, as it dominates  
69 the diapycnal redistribution of components and suspended materials. It is also important  
70 for the resuspension of bottom materials. Large-scale sloping ocean bottoms are  
71 important for both the generation (e.g., Bell, 1975; LeBlond and Mysak, 1978;  
72 Morozov, 1995) and the breaking of internal waves (e.g., Eriksen, 1982). Not only the  
73 topography around ocean basin's edges act as source/sink of internal waves but  
74 especially also the topography of ridges, mountain ranges and seamounts distributed  
75 over the ocean floor (Baines, 2007). Above sufficiently steep slopes, exceeding those  
76 of the main internal carrier (e.g., tidal) wave containing largest energy, and  $>1$  km ( $>$   
77 the internal wavelength) horizontal scale topography, turbulent mixing averages 10,000  
78 times molecular diffusion (e.g., Aucan et al., 2006; van Haren and Gostiaux, 2012).  
79 This mixing is considered to have a high potential (Cyr and van Haren, 2016)  
80 ~~'efficient'~~ as the back and forth sloshing of the carrier wave ensures a rapid  
81 restratification down to within a meter from the sea floor, ~~while~~ Apparently, mixed  
82 waters are transported into the interior along isopycnals or, perhaps along isobaths by  
83 advective flows. Sloping large-scale topography has received more scientific interest  
84 than abyssal 'plains' due to the higher turbulence intensity of internal wave breaking.  
85 However, abyssal plains occupy a large part of the ocean and the processes that occur

Formatted: Font: 12 pt

86 there deserve investigation. For example, hills on the bottom form corrugated  
87 topography instead of the seemingly flat bottom and contribute to internal wave  
88 generation and breaking. The number of these hills is so numerous (Baines, 2007;  
89 Morozov, 2018) that it may be questioned whether the abyssal plain and its overlying  
90 waters may be called a 'quiescent zone'.

91 This is because occasional 'benthic storms' have been reported to disturb the  
92 quiescence, even at great depths >5000 m (Hollister and McCave, 1984). The effects  
93 can be great on sediment reworking and particles remain resuspended long after the  
94 'storm' has passed. Such resuspension has obvious effects on deep-sea benthic biology  
95 and remineralization (e.g., Lochte, 1992). In order to avoid semantic problems, the term  
96 'benthic boundary layer' is reserved here for the sediment-water interface (at the bottom  
97 of the water phase of the ocean), following common practice by sedimentologists and  
98 marine chemists (e.g., Boudreau and Jørgensen, 2001). The term 'bottom boundary  
99 layer' follows the physical oceanographic convention to describe the lower part of the  
100 water phase of the ocean which is almost uniform in density, using the threshold  
101 criterion of the large (100-m) scale buoyancy frequency  $N < 3 \times 10^{-4} \text{ s}^{-1}$ . This is the layer  
102 of investigation here together with overlying ~~higher~~ density-stratified waters in  
103 the interior. The amount of homogeneity is also a subject of study. Historic observations  
104 have demonstrated the variability of the abyssal plain bottom boundary layer in space  
105 and time (e.g., Wimbush, 1970; Armi and Millard, 1976; Armi and D'Asaro, 1980).

106 Similar to the ocean interior, waters above abyssal plains are considered calm ocean  
107 regions in terms of weak turbulent exchange. However, the (bulk) Reynolds number  $Re$   
108  $= UL/\nu$  as a measure for the transition from laminar ('molecular') to turbulent flow is  
109 not small. With the kinematic viscosity  $\nu \approx 1.5 \times 10^{-6} \text{ m}^2 \text{ s}^{-1}$  to characterize the molecular  
110 water properties, ~~and~~ characteristic velocity,  $U \approx 0.05 \text{ m s}^{-1}$ , and length scale,  $L \approx 30$

111 m, of the (internal wave) water flow,  $Re \approx 10^6$ , or highly turbulent (e.g., Tennekes and  
112 Lumley, 1972; Fritts et al., 2016) even for the unbounded open ocean and atmosphere  
113 interiors.

114 Both convective instability of gravitationally unstable denser over less dense water  
115 and shear-induced Kelvin-Helmholtz instability (KHi) are probable for internal wave  
116 breaking, for a recent model see (Thorpe, 2018). Earlier models (e.g., Garrett and  
117 Munk, 1972) suggested ~~KHi~~ were dominant over convective instabilities,  
118 especially considering the construction of the internal wave field of smallest vertical  
119 scales residing at their lowest frequencies (e.g., LeBlond and Mysak, 1978). Most  
120 kinetic energy is found at these frequencies and thus a large background shear is  
121 generated (e.g., Alford and Gregg, 2001) through which shorter length-scale waves near  
122 the buoyancy frequency propagate, break and overturn. The result is an open-ocean  
123 wave field that is highly intermittent producing a very steppy, non-smooth sheet-and-  
124 layer-structured ocean interior stratification (e.g., Lazier, 1973; Fritts et al., 2016). In  
125 the near-surface ocean, such internal wave propagation and deformation (straining) of  
126 stratification has been observed to migrate through the density field in space and time.

127 The lower bound of inertio-gravity wave (IGW) frequencies is determined by the  
128 local vertical Coriolis parameter, i.e. the inertial frequency,  $f = 2\Omega\sin\phi$  of the Earth  
129 rotational vector  $\Omega$  at latitude  $\phi$ . This bound becomes significantly modified to lower  
130 sub-inertial frequencies under weak stratification ( $\sim N^2$ ), when  $N < 10f$ , approximately.  
131 From not-approximated equations, minimum and maximum IGW-frequencies are  
132 calculated as  $[\sigma_{\min}, \sigma_{\max}] = (s \mp (s^2 - f^2 N^2)^{1/2})^{1/2}$  using  $2s = N^2 + f^2 + f_h^2 \cos^2 \gamma$ , in which  
133  $\gamma$  is the angle to the north ( $\gamma = 0$  denoting meridional propagation) and the horizontal  
134 component of the Coriolis parameter  $f_h = 2\Omega \cos\phi$  becomes important for internal wave  
135 dynamics (e.g., LeBlond and Mysak, 1978; Gerkema et al., 2008).

136 In the present paper, detailed moored observations from a Pacific abyssal ‘plain’  
137 confirm Lazier (1973)’s steppy sheet-and-layer stratification. The new observations are  
138 used to investigate the interplay between motions in the stratified interior and the effects  
139 on the bottom boundary layer. The small-scale topography may prove not negligible  
140 for internal waves in comparison with large oceanic ridges, seamounts and continental  
141 slopes: Following Bell (1975), recent studies demonstrate the potential of substantial  
142 internal wave generation by flow over abyssal hills under particular slope and  
143 stratification conditions (e.g., Nikurashin et al., 2014; Hibiya et al., 2017). We are  
144 interested in observational details of the IGW-induced turbulent processes.

145

## 146 **2 Methods and Data handling**

147 Observations were made from the German R/V Sonne above the abyssal hills in the  
148 northeast-equatorial Pacific Ocean, West of the oriental Pacific Ridge (Fig. 1). The area  
149 is not mountainous but also not flat. It is characterized by numerous hills, extending  
150 several 100 m above the surrounding sea floor. The average bottom slope is  $1.2 \pm 0.6^\circ$ ,  
151 computed from the lower panel of Fig. 1 using the 1'-resolution version of the Smith  
152 and Sandwell (1997) seafloor topography. This slope is about three times larger than  
153 that of the Hatteras plain (the area of observations by Armi and D'Asaro, 1980) and  
154 about three times smaller than that for a similar size area from the Mid-Atlantic Ridge  
155 (West of the Azores). SeaBird SBE911plus CTD profiles were collected 1 km around  
156  $11^\circ 50.630'N$ ,  $116^\circ 57.938' W$  in  $4114 \pm 20$  m water depth at 20-23 March and 06 June  
157 2015. Between 19 March and 02 June a taut-wire mooring was deployed at the above  
158 coordinates. At this latitude,  $f = 0.299 \times 10^{-4} \text{ s}^{-1}$  ( $\approx 0.4$  cpd, cycles per day) and  $f_h =$   
159  $1.427 \times 10^{-4} \text{ s}^{-1}$  ( $\approx 2$  cpd). A 130 m high elevation has its ridge at approximately 5 km  
160 West of the mooring.

161 The mooring consisted of 2700 N of net top-buoyancy at about 450 m from the  
162 bottom. With current speeds of less than  $0.15 \text{ m s}^{-1}$ , the buoy did not move more than  
163 0.1 m vertically and 1 m horizontally, as was verified using pressure and tilt sensors.  
164 The mooring line held three single point Nortek AquaDopp acoustic current meters, at  
165 6, 207 and 408 mab, meters above the bottom. The middle current meter was clamped  
166 to a 0.0063 m diameter plastic coated steel cable. To this 400 m long insulated cable  
167 201 custom-made 'NIOZ4' temperature sensors were taped at 2.0 m intervals. To  
168 deploy the 400 m long instrumented cable it was spooled from a custom-made large-  
169 diameter drum with separate 'lanes' for T-sensors and the cable (Appendix A).

170 The NIOZ4 T-sensor noise level is  $<0.1 \text{ mK}$  ([verified in Appendix B](#)), the precision  
171  $<0.5 \text{ mK}$  (van Haren et al., 2009; NIOZ4 is an update of NIOZ3 with similar  
172 characteristics). The sensors sampled at a rate of 1 Hz and were synchronized via  
173 induction every 4 h, so that their timing mismatch was  $<0.02 \text{ s}$  and the 400 m profile  
174 was measured nearly instantaneously. As in the abyssal area temperature variations are  
175 extremely small, severe constraints were put on the de-spiking and noise levels of data.  
176 Under these constraints, 35 (17% of) T-sensors showed electronic timing, calibration  
177 or noise problems. Their data are no longer considered and are linearly interpolated.  
178 This low-biases estimates of turbulence parameters like dissipation rate and diffusivity  
179 from T-sensor data by about 10%. Appendix B describes further data processing details.

180 During three days around the time of mooring deployment and two days after  
181 recovery, shipborne conductivity-temperature-depth (CTD) profiles were made for  
182 monitoring the temperature-salinity variability from 5 m below the surface to 10 mab.  
183 A calibrated SeaBird 911plus CTD was used. The CTD data were processed using the  
184 standard procedures incorporated in the SBE-software, including corrections for cell  
185 thermal mass using the parameter setting of Mensah et al. (2009) and sensor time-

186 alignment. All other analyses were performed with Conservative ( $\sigma_\theta$ -potential)  
187 Temperature ( $\Theta$ ), absolute salinity SA and density anomalies  $\sigma_\theta$  referenced to 4000  
188 dbar using the GSW-software described in (IOC, SCOR, IAPSO, 2010).

189 After establishment of the temperature-density relationship from shipborne CTD-  
190 profiles (Appendix B), the moored T-sensor data are used to estimate turbulence  
191 dissipation rate  $\varepsilon = c_1^2 d^2 N^3$  and vertical eddy diffusivity  $K_z = m_1 c_1^2 d^2 N$  following the  
192 method of reordering potentially unstable vertical density profiles in statically stable  
193 ones, as proposed by Thorpe (1977). Here,  $d$  denotes the displacements between  
194 unordered (measured) and reordered profiles.  $N$  denotes the buoyancy frequency  
195 computed from the reordered profiles. We use standard constant values of  $c_1 = 0.8$  for  
196 the Ozmidov/overturb scale factor and  $m_1 = 0.2$  for the mixing efficiency (e.g., Osborn,  
197 1980; Dillon, 1982; Oakey, 1982). The validity of the latter is justified after inspection  
198 of the temperature-scalar spectral inertial subrange content (being mainly shear-driven,  
199 cf. Section 3) and also considering the generally long averaging periods over many  
200 (>1000) profiles. The mixing efficiency value is close to the tidal mean mixing potential  
201 observed by Cyr and van Haren (2016), also in layers in which stratification is weak.  
202 Internal waves not only induce mixing through their breaking but also allow for rapid  
203 restratification, making the mixing rather efficient.

204 The moored T-sensor data are thus much more precise and apt for using Thorpe  
205 overturning scales to estimate turbulence parameters than shipborne CTD-data. Most  
206 of the concerns raised e.g. by Johnson and Garrett (2004) on this method using  
207 shipborne CTD-data are not relevant here. First, instead of a single (CTD-)profile,  
208 averaging is performed over  $O(10^3-10^4)$  profiles, i.e. at least over the buoyancy time  
209 scale and more commonly over the inertial time scale. Second, the mooring is not  
210 moving more than 0.1 m vertically and if moving it does so on a sub-inertial time-scale:

Formatted: Font: 12 pt, Not Italic

Formatted: Font: 12 pt

Formatted: Font: 12 pt, Not Italic

Formatted: Superscript

Formatted: Superscript



211 No corrections are needed for ‘ship motions’ and instrumental/frame flow disturbance,  
212 as for CTD-data. Third, the noise level of the moored T-sensors is very low, about one-  
213 third of the high-precision sensors used in SeaBird 911 CTD (Appendix B). Fourth, the  
214 environment in which the observations are made is dominated by internal wave  
215 breaking (above topography), where turbulent mixing is generally not weak and where  
216 a tight temperature-density relationship exists. Because of points three and four,  
217 complex noise reduction as in Piera et al. (2002) is not needed for moored T-sensor  
218 data. More in general for these data in such environments, Thorpe overturning scales  
219 can be solidly determined using temperature sensor data instead of more imprecise  
220 density (T- and S-sensor data) as salinity intrusions are not found important as verified.

221 The buoyancy Reynolds number  $Re_b = \epsilon/\nu N^2$  is used to distinguish between areas of  
222 weak,  $Re_b < 100$ , and strong turbulence.

223 In the following, averaging over time is denoted by [...], averaging over depth-  
224 range by  $\langle \dots \rangle$ . The specific averaging periods and ranges are indicated with the mean  
225 values. The vertical coordinate  $z$  is taken upward from the bottom  $z = 0$ . Shear-induced  
226 overturns are visually identified as inclined S-shapes in  $\log(N)$  panels while convection  
227 demonstrates more vertical columns (e.g., van Haren and Gostiaux, 2012; Fritts et al.,  
228 2016). It is noted that both types occur simultaneously, as columns exhibit secondary  
229 shear along the edges and KHi demonstrate convection in their interior core (Li and Li,  
230 2004; Matsumoto and Hoshino, 2006).

231

### 232 **3 Observations**

233 High-resolution T-sensor data analysis was difficult because of the very small  
234 temperature ranges and variations of only a few mK over, especially the lower, 100 m  
235 of the observed range. This rate of variation is less than the local adiabatic lapse rate.

236 First, a spectral analysis is performed to investigate the internal wave and turbulence  
237 ranges and slopes appearance. Then, particular turbulent overturning aspects of internal  
238 wave breaking are demonstrated in magnifications of time-depth series. Finally,  
239 profiles of mean turbulence parameter estimates are used to focus on the extent and  
240 nature of the bottom boundary layer.

241 .

### 242 3.1 Spectral overview

243 The small temperature ranges are reflected in the low values of the large-scale  
244 stratification (Fig. 2a). (Salinity contributes weakly to density variations, Appendix B).  
245 Typical buoyancy periods are 3 h, increasing to roughly 9 h in near-homogeneous  
246 layers, e.g., near the bottom. In spite of the weak stratification, the IGW-band,  
247 approximately between and including  $f$  and  $N$ , is one order of magnitude wide. This  
248 IGW-bandwidth is observable in spectra of turbulence dissipation rate (Fig. 2b) and  
249 temperature variance (Fig. 2c).

250 The T-sensors have identical instrumental (white) noise levels at frequencies  $\sigma >$   
251  $10^4$  cpd and near-equal variance at sub-inertial frequencies  $\sigma < f$  (Fig. 2c). From the  
252 former an approximate one standard deviation is observed of  $\text{std} \approx 4 \times 10^{-5} \text{ }^\circ\text{C}$ . see also  
253 Appendix B. In the frequency range in between, and especially for  $f \sim \sigma \sim N$ , the  
254 upper T-sensor data demonstrate largest variance by up to two orders of magnitude at  
255  $\sigma \approx N$  compared with the lower T-sensor data. In this frequency range, the upper T-  
256 sensor spectrum has a slope of about -1 (in the log-log domain), which reflects a  
257 dominance of smooth quasi-linear ocean-interior IGW (van Haren and Gostiaux, 2009).  
258 Extending above this slope is a small near-inertial peak reflecting rarely observed low  
259 internal wave frequency vertical motions in weakly stratified waters (van Haren and  
260 Millot, 2005). The steep -3 roll-off at super-buoyancy frequencies  $\sigma > N$  is also

Formatted: Superscript

261 associated with IGW. At frequencies in between, and for the lower T-sensor data  
262 throughout the frequency range, a slope of  $-5/3$  is found. This reflects passive scalar  
263 turbulence dominated by shear (Tennekes and Lumley, 1972). After sufficient  
264 averaging this passive scalar turbulence is efficient (Mater et al., 2015). At intermediate  
265 depth levels, and in short frequency ranges of the spectral data, slopes vary between  $-2$   
266 and  $-1$ . Slopes between  $-5/3$  and  $-1$  would point at active scalar turbulence of convective  
267 mixing (Cimatoribus and van Haren, 2015) while a slope of  $-2$  reflects finestructure  
268 contamination (Phillips, 1971) or a saturated IGW-field (Garrett and Munk, 1972).

269 While the upper T-sensor data contain most variance and hence most potential  
270 energy in the IGW-band, the spectrum of estimated turbulence dissipation rate  
271 demonstrates nearly two orders of magnitude higher variance for the lowest T-sensor  
272 data around  $\sigma \approx f$  (Fig. 2b). The stratification around the upper sensor supports  
273 substantial internal waves, but weak turbulence provides a flat and featureless spectrum  
274 of the dissipation rate time series. The lower layer  $\varepsilon$ -spectrum shows a relative peak  
275 near  $\sigma \approx 2f$  besides one at sub-inertial frequencies, but no peaks at the inertial and  
276 semidiurnal tidal frequencies. The lack of peaks at the latter frequencies is somewhat  
277 unexpected as the kinetic energy (Fig. 2b, blue spectrum) is highly dominated by  
278 motions at  $M_2$  and, to a lesser extent, at just super-inertial  $1.04f$ .

279 In contrast, the ‘large-scale shear’ spectrum computed between current meters 200  
280 m apart (Fig. 2b, light-blue) shows a single dominant peak at just sub-inertial  $0.99f$ ,  
281 with a complete absence of a tidal peak. This reflects large quasi-barotropic vertical  
282 length scales  $>400$  m exceeding the mooring range at semidiurnal tidal frequencies and  
283 commonly known ‘small’  $\leq 200$  m vertical length scales at near-inertial frequencies.  
284 The large-scale shear has an average magnitude of  $\langle |\mathbf{S}| \rangle = 2 \times 10^{-4} \text{ s}^{-1}$  for 207-408 mab  
285 and  $1.6 \times 10^{-4} \text{ s}^{-1}$  for 6-207 mab, with peak values of  $|\mathbf{S}| = 6 \times 10^{-4} \text{ s}^{-1}$  and  $4 \times 10^{-4} \text{ s}^{-1}$ ,

286 respectively. Considering mean  $\langle N \rangle \approx 5.5 \times 10^{-4} \text{ s}^{-1}$  with variations over one order of  
287 magnitude, the mean gradient Richardson number  $Ri = N^2/|S|^2$  is ~~just~~-larger than unity  
288 while marginally stable conditions ( $Ri \approx 0.5$ ; Abarbanel et al., 1984) occur regularly in  
289 'bursts'. Unfortunately, higher vertical resolution (acoustic profiler) current  
290 measurements were not available to establish smaller scale shear variations associated  
291 with higher frequency internal waves propagating through the (large-scale) shear  
292 generated by the near-inertial motions. Such smaller-scale variations in shear are  
293 expected in association with sheet-and-layer variation in stratification observed using  
294 the detailed high-resolution T-sensors.

295

### 296 3.2 Detailed periods

297 The days shortly after deployment were amongst the quietest in terms of turbulence  
298 during the entire mooring period. Nevertheless, some near-bottom and interior turbulent  
299 overturning was observed occasionally (Fig. 3). For this example, averages of  
300 turbulence parameters for one day time interval and 400 m vertical interval are  
301 estimated as  $\langle \epsilon \rangle = 1.2 \pm 0.8 \times 10^{-10} \text{ m}^2 \text{ s}^{-3}$  and  $\langle K_z \rangle = 7 \pm 4 \times 10^{-5} \text{ m}^2 \text{ s}^{-1}$ . These values  
302 are typical for open-ocean 'weak turbulence' conditions although mean  $Re_b \approx 200$ .  
303 Shortest isotherm distances are observed far (a few 100 m) above the bottom (Fig. 3a)  
304 reflecting the generally stronger stratification (Fig. 3b) there. While the upper isotherms  
305 smoothly oscillate with a periodicity close to the average buoyancy period of 3.2 h and  
306 amplitudes of about 15 m, the stratification is organized in fine-scale layering  
307 throughout, except for the lower 50 m of the range. Detailed inspection of sheets (large  
308 values of small-scale  $N_s$  in Fig. 3b) demonstrates that they gain and lose strength 'strain'  
309 over time scales of the buoyancy period and shorter, that they merge and deviate, e.g.  
310 around 300 mab between days 82.25 and 82.5 in Fig. 3b—upper left black ellipse, also

311 from the isotherms, in association with the largest turbulent overturns (Fig. 3c) eroding  
312 them. This is reflected in non-smooth isotherms, e.g., the interior overturning near 220  
313 mab and day 82.6 [Fig. 3b-right ellipse](#). The patches of interior turbulent overturns, with  
314 displacements  $|d| < 10$  m in this example, are elongated in time-depth space, having  
315 timescales of up to the local buoyancy period but not longer. Thus, it is unlikely they  
316 represent an intrusion that can have timescales [\(well\)](#) exceeding the local buoyancy  
317 timescale. Considering the  $0.05 \text{ m s}^{-1}$  average (tidal) advection speed, their horizontal  
318 spatial extent is estimated to be about 500 m. This extent is very close to the estimated  
319 baroclinic Rossby radius of deformation  $Ro_i = NH/n\pi f \approx 600$  m for vertical length scale  
320  $H = 100$  m and first mode  $n = 1$ .

321 The near-bottom range is different, with buoyancy periods approaching the  
322 semidiurnal period, sometimes longer. However, a permanent turbulent and  
323 homogeneous 'bottom boundary layer' is not observed, after further detailing (Fig. 4).

324 Examples of the upper, middle and lower 100 m of the T-sensor range are presented  
325 in magnifications with different colour range, while maintaining the same isotherm  
326 interval of 5 mK (Fig 4a-c). For this period, the mean flow is  $0.04 \pm 0.01 \text{ m s}^{-1}$  towards  
327 the SE, more or less off-slope of the small ridge located 5 km West of the mooring.  
328 Between these panels, the high-frequency internal wave variations decrease in  
329 frequency from upper to lower, but all panels do show overturning (e.g., [as indicated](#)  
330 [by the black ellipses](#): ~~A~~ around 330 mab and day 82.35 in Fig. 4a, 200 mab and day  
331 82.6 in Fig. 4b and 35 mab and day 82.5 in Fig. 4c). In Fig. 4c the entire T-colour range  
332 represents only 1 mK. In this depth-range, the low-frequency variation in temperature  
333 and, while not related, stratification vary with a period of about 15.5 h. These variations  
334 do not have tidal-[harmonic](#) periodicity and are thus not reflecting bottom friction of the

335 dominant tidal currents. Quasi-convective overturning seems to occur after day 82.5. In  
336 the interior > 100 mab most overturning seems shear-induced.

337 The overturning phenomena are more intensely observed during a less quiescent  
338 day (Figs 5, 6), when turbulence values are about five times larger and mean  $Re_b \approx$   
339 1400. Between 300 and 400 mab isotherms remain quite smooth with near-linear  
340 internal wave oscillations (Fig. 5a,b). The lower 300 m are quasi-permanently in  
341 turbulent overturning but in specific bands only around about 310 mab and around 160

342 mab (Fig. 5c,d). The latter is approximately the height of the nearest crest, still 5 km  
343 away from the mooring. Rms vertical overturn displacements are 2-3 times larger than  
344 in the previous example. Their duration is commensurate the local buoyancy periods.

345 The smooth upper range isotherms centered around 360 mab are reflected in 75 m, one  
346 day wide range of turbulence dissipation rates below threshold (Fig. 5d). But, above  
347 and especially below, turbulent overturning is more intense, see also the detailed panels

348 (Fig. 6). While shear-induced overturning is seen, e.g., in the black ellipses: Around  
349 350 mab day 98.0 (Fig. 6a) and around 200 mab day 97.95 (Fig. 6b), convective  
350 turbulence columns are observed e.g. around 60 mab and day 98 (Fig. 6c—black  
351 ellipse)- $\theta$ . It is noted however, that in the presented data we cannot distinguish the fine-

352 detailed secondary overturning, e.g. shear-induced billow formation, on convection  
353 ‘vertical columns’. In the lower 100 mab, overturning occurs on the large (~50 m,  
354 hours) scales but also on much shorter time scales of 10 min. This results in isotherm  
355 excursions that are faster than further away from the bottom. A coupling between  
356 interior and near-bottom (turbulence and internal wave) motions is difficult to establish.

357 For example, short-scale (high-frequency  $\sigma \gg f$ ) internal wave propagation >200 mab  
358 shows downward phase (i.e., upward energy) propagation around day 97.75 (Fig. 5a)  
359 with no clear correspondence with the lower 100 mab. Between days 98.2 and 98.5

360 however, the phase propagation appears upward (downward energy propagation), with  
361 some indication for correspondence between upper 200-400 mab and lower 100 mab.  
362 During this period the mean  $0.04 \text{ m s}^{-1}$  flow was towards W (upslope).

363 Another example of (two days) of rather intense turbulence is given in Figs 7,8,  
364 with similar average values as in the previous example. It demonstrates in particular  
365 relatively large-amplitude near-N internal waves (e.g., day 112.9, 310 mab, [Fig. 7a—](#)  
366 [left black ellipse](#)) and bursts of elongated weakly sloping (slanting) shear-induced  
367 overturning (e.g., day 113.2, 210 mab [and 50 mab Fig. 7c—black ellipses](#)). The near-  
368 N waves appear quasi-solitary lasting for maximum 2 periods and having about 30 m  
369 trough-crest level variation. As before, the vertical phase propagation of these waves is  
370 ambiguous. In addition, very high-frequency ‘internal waves’ around the small-scale  
371 buoyancy frequency are observed in the present example, with small amplitudes  $<10 \text{ m}$   
372 visible in the isotherms around 300 mab, day 113.1 ([Fig. 7a—right black ellipse](#)).

373 The interior turbulent overturning appears more intense than in preceding examples,  
374 with larger excursions of about  $|50 \text{ m}|$  near 200 mab (Fig. 8b). This slanting layer of  
375 elongated overturns seems originally shear-induced, but the overturns show clear  
376 convective properties during the observed stage. The largest duration of patches is close  
377 to the local mean buoyancy period. The entire layer demonstrates numerous shorter  
378 time-scale overturning. Cross-overs (sudden changes in the vertical) are observed of  
379 isotherms from thin high- $N_s$  above low- $N_s$  turbulent patches to below the low- $N_s$   
380 patches, e.g. day 112.6 in Fig. 7b, and vice-versa, e.g. days 113.1 and 113.5 (recall that  
381 small-scale  $N_s$  is computed from reordered  $\Theta$ -profiles). This evidences one-sided,  
382 rather than two-sided, turbulent mixing eroding a stratified layer either from below or  
383 above.

384 The interior shear-induced turbulent overturning seems to have some  
385 correspondence with the (top of) the near-bottom layer: on days 113.1-113.6 interior  
386 mixing is accompanied by similar near-bottom mixing. The status of the near-bottom  
387 layer ( $z < 75$  mab) switches from large-scale convective instabilities (day  $< 113.1$ ) to  
388 stratified shear-induced overturning ( $113.1 < \text{day} < 113.6$ ) and back to large-scale  
389 convection with probably secondary shear instabilities (day  $> 113.6$ ). This is visible in  
390 the displacements (Fig. 7c) and dissipation rate (Fig. 7d), and part of it in detailed  
391 temperature (Fig. 8c). The transitions between near-bottom ‘mixing regimes’ are  
392 abruptly marked by near-bottom fronts. The mean  $0.03 \text{ m s}^{-1}$  flow is SW-directed (more  
393 or less on-slope).

394 A two-day example of a relatively intensely turbulent near-bottom layer is given in  
395 Figs 9,10. Two periods of about 9 h long (around days 135.9 and 136.8), 22 h apart,  
396 demonstrate  $>50$  m tall convective overturning extending nearly 100 mab. In between,  
397 large-scale shear-induced overturning dominates, with a possible correspondence with  
398 the interior in the form of a large-scale doming of isotherms and mixing in patches  
399 around day 135.4 (lasting between  $135.25 < \text{day} < 135.75$ , generally around 200 mab).  
400 The doming interior isotherms are not repeated in the lowermost isotherm capping of  
401 the near-bottom layer, except perhaps for the down-going flank/front. The mean NE-  
402 flow is  $0.03 \text{ m s}^{-1}$  (more or less off-slope). In this example as well as in previous ones  
403 no evidence is found for ‘smooth’ intrusions, as demonstrated in the atmospheric DNS-  
404 model by Fritts et al. (2016).

405

### 406 **3.3 Mean profiles**

407 The different mixing observed in the interior and near the bottom is reflected in the  
408 ‘mean profiles’ of estimated turbulence parameters (Fig. 11a-c). These plots are



409 constructed from patching together consecutive one-day portions of data that are locally  
410 drift-corrected. Time-average values of  $[\varepsilon]$ , turbulent flux (providing average  $[K_z]$ ) and  
411 stratification (providing average  $[N]$ ) are computed for each depth level. Averaging  
412 over a day and longer is exceeding the buoyancy period even in these weakly stratified  
413 waters. It is thus considered appropriate for internal wave induced mixing. This may  
414 lead to some counter-intuitive averaging of displacement values greater than the local  
415 distance to the bottom at particular depths. However, it is noted that Prandtl's concept  
416 of overturn sizes never exceeding the distance to a solid boundary was based on  
417 turbulent friction of flow over a flat plate. As Tennekes and Lumley (1972) indicate,  
418 such 'mixing length theoretical concept' may not be valid for flows with more than one  
419 characteristic velocity. The present area is not known for geothermal fluxes, which are  
420 also not observed in the present data. Here, the dominant turbulence generation process  
421 seems induced by internal waves, as the observed turbulence well extends above the  
422 layer O(10 m) of bottom friction.

423 The mean dissipation rate (Fig. 11a) and diffusivity (Fig. 11b) profiles are observed  
424 to be largest between 7 and 60 mab, with values at least ten times higher than in the  
425 interior. This suggests internal wave breaking impact on sediment resuspension. Near  
426 the bottom, stratification (Fig. 11c) is low but not as weak as some 15 m higher-up. At  
427 about 30 mab local minima of  $[\varepsilon]$  and  $[K_z]$  are found. The average top of weakly  
428 stratified  $N < 3 \times 10^{-4} \text{ s}^{-1} \approx 4 \text{ cpd}$  'bottom boundary layer' is at about 65 mab (Fig. 11d).  
429 This sub-maximum in the pdf-distribution is broader than a second maximum closer to  
430 the bottom, near 10 mab. This smaller bottom boundary layer is probably induced by  
431 current friction, whereas the larger layer with an average of 65 mab probably by internal  
432 wave turbulence. Around 110 mab the maximum of the bottom boundary layer is found  
433 with few occurrences (Fig. 11d). Around that height, the profiles' minimum turbulence

434 values are observed at the depth of a weak local maximum  $N$  (Fig. 11c). This layer  
435 separates the interior turbulent mixing with maximum around 200 mab and the ‘near-  
436 bottom’ (<100 mab) mixing. From the detailed data in Section 3.2 correspondence is  
437 observed between these layers, occurring at least occasionally. Considering the weaker  
438 (mean) turbulence in between, it is expected that the correspondence is communicated  
439 via internal waves and their shear. As for freely propagating IGW, its frequency band  
440 has a one order of magnitude width nearly everywhere, also close to the bottom (Fig.  
441 11c). It is noted that inertial waves from all (horizontal) angles can propagate through  
442 homogeneous, weakly and strongly stratified layers, thus providing local shear  
443 (LeBlond and Mysak, 1978; van Haren and Millot, 2004).

444

#### 445 **4 Discussion**

446 The observed turbulence at 100 m and higher above the sea floor is mainly induced  
447 by (sub-)inertial shear and (small-scale) internal wave breaking. This confirms  
448 suggestions by Garrett and Munk (1972) for interior IGW. However, this shear is not  
449 found to be decreasing with  $N$  (depth) in the present data. The >100 mab depth range  
450 is termed ‘the interior’ here although perhaps not being representative for the ‘mid-  
451 water ocean’ as it is still within the height range of surrounding hilly topography. The  
452 130 m high ridge 5 km West of the mooring is well outside the baroclinic Rossby radius  
453 of deformation ( $Ro_i \approx 500$  m). It unlikely influences the near-bottom turbulence here,  
454 also because no correlation is found between across-slope flow and turbulence  
455 intensity. The interior is occasionally found quiescent, with parameter values below the  
456 threshold of very weak turbulence at about ten times molecular diffusion values. More  
457 commonly the interior is found weakly-moderately turbulent with values

458 commensurate with open-ocean values (e.g., Gregg, 1989) following the interaction of  
459 high-frequency internal waves breaking and inertial shear.

460 The observed dominance of near-inertial shear at the 200 m vertical scale, the  
461 vertical separation distance between the current meters, is found far below the depths  
462 of atmospheric disturbances generation near the surface. It seems related with local  
463 generation, possibly in association with the hilly topography (St. Laurent et al., 2012;  
464 Nikurashin et al., 2014; Alford et al., 2016; Hibiya et al., 2017). Also, the 200 m vertical  
465 scale is observed to well exceed the excursion length (amplitude) of the internal waves,  
466 the scale of overturn displacements and the size of most density stratification layering.  
467 In contrast, above the Mid-Atlantic Ridge, where tidal currents are only twice as  
468 energetic as near-inertial motions, the vertical length scale of tides equals that of near-  
469 inertial motions around about 100-150 m (van Haren, 2007). There and in the open  
470 ocean, near-inertial motions dominate shear at shorter scales with an expected peak  
471 around 25 m (e.g., Gregg, 1989). ~~LikeAs~~ in the present data, the near-inertial shear  
472 showed a shift to sub-inertial frequencies (van Haren, 2007). ~~BecauseAs~~ the shear-  
473 magnitude was found to be concentrated in sheets of high-N, it was suggested that this  
474 red-shift was due to the broadening of the IGW-band in low-N layers. As a result, an  
475 effective coupling between shear, stratification and the IGW-band was established.  
476 Considering the similarity in sheet-and-layering and (large-scale) shear, such coupling  
477 is also suggested in the present observations from the deep-sea over less dramatic  
478 topography.

479 As for a potential coupling between the interior and the observed more intense near-  
480 bottom turbulence, internal wave propagation is ~~found~~observed in both up and down  
481 directions. In the lower 50 mab the variability in turbulence intensity, in turbulence  
482 processes of shear and convection, and in stratification demonstrates a non-smooth

483 bottom boundary layer, perhaps better defined as an active near-bottom turbulent zone  
484 ‘NBTZ’. As reported~~observed~~ by Armi and D’Asaro (1980), the extent above the  
485 bottom of turbulent mixing and a near-homogeneous mixed layer varies between <7  
486 and 100 mab with a mean of about 65 mab. This mean value exceeds the common  
487 frictional boundary scales that can be computed for flow over flat bottoms on a rotating  
488 sphere (Ekman, 1905), although parametrizations provide one order of magnitude  
489 differences:  $\delta = (2A/f)^{1/2}$ , A the turbulent viscosity; if taken  $A = K_z \approx 10^{-4}-10^{-3} \text{ m}^2 \text{ s}^{-1}$ ;  
490 Fig. 11b,  $\delta \approx 2.5-8 \text{ m}$ , or  $\delta = 2 \times 10^{-3} U/f$ ;  $U \approx 0.05 \text{ m s}^{-1}$ :  $\delta \approx 30 \text{ m}$  (e.g., Tennekes and  
491 Lumley, 1972). Both are (substantially) less than the NBTZ found here, which thus  
492 seems to be governed by other processes such as IGW-breaking. Such a relatively weak  
493 contribution of bottom friction compared to interior shear- and internal wave-  
494 turbulence was also observed using the instrumentation near the bottom of through-  
495 flows like Romanche Fracture Zone (van Haren et al., 2014) and Kane Gap (van Haren  
496 et al., 2013) where current speeds are larger  $\sim 0.25 \text{ m s}^{-1}$ . The through-flow data form a  
497 contrast with the present observations, because the near-bottom zone is stratified there  
498 despite relatively strong shear flow. They are similar in showing internal wave  
499 convection penetrating to close to the bottom, occasionally.

Formatted: Superscript

Formatted: Font: 12 pt, Not Italic

Formatted: Font: 12 pt, Not Italic

500 Sloping fronts are observed near the bottom in Armi and D’Asaro (1980)’s, Thorpe  
501 (1983)’s and the present data. However, isopycnal transport of mixed waters seems not  
502 away from the boundary as proposed in (Armi and D’Asaro, 1980) but rather into the  
503 NBTZ sloping downward with time (present data). This governs the variable height of  
504 the NBTZ.

505 Although bottom slopes were about three times larger in the Northeast Pacific than  
506 above the Hatteras Plain, the present observations show many similarities as in Armi  
507 and D’Asaro (1980). They also show many similarities with equivalent turbulence

508 estimates in both the interior and in the variable lower 100 mab compared with those  
509 from above the central Alboran Sea, a basin of the Mediterranean Sea (van Haren,  
510 2015), and with observations made in the southeast Pacific abyssal hill plains around -  
511 07° 07.213' S, -088° 24.202' W, East of the oriental Pacific Ridge (unpublished results).  
512 Thus it seems that the precise characteristics (slopes/heights) of the hilly topography is  
513 not very relevant for the observed internal wave intensity and turbulence generation, as  
514 long as the bottom is not a flat plate and the hills have IGW-scales. This associates with  
515 the suggestion by Baines (2007) and Morozov (2018) that small-scale topography may  
516 prove not negligible for internal wave generation and dissipation in comparison with  
517 large oceanic ridges, seamounts and continental slopes. After all, flat bottoms do hardly  
518 exist in the ocean, depending on the length scale investigated. This probably holds for  
519 both the present observations in the stratified interior and those in the NBTZ.

Formatted: Font: 12 pt

Formatted: Font: 12 pt

520 The tenfold larger turbulence intensity observed here in the NBTZ compared to the  
521 stratified interior in the latter marks a relatively extended inertial subrange. Although  
522 the near-bottom (6 mab) current speed magnitudes are typically  $0.05 \text{ m s}^{-1}$ , up to about  
523  $0.10 \text{ m s}^{-1}$ , the estimated turbulence intensity of  $10^3$ - $10^4$  times larger than molecular  
524 diffusion is sufficient to mix materials up to 100 mab, the extent of observed vertical  
525 mixing in the layer adjacent to the bottom. This reflects previous observations of  
526 nephels, turbid waters of enhanced suspended materials (Armi and D'Asaro, 1980). It  
527 is expected that this material is resuspended locally, as the more intensely turbulent  
528 steeper large-scale slopes are too far away horizontally, far beyond the baroclinic  
529 Rossby radius of deformation.

530 For the future, modelling may provide better insights in the precise coupling  
531 between near-inertial shear and internal wave breaking, leading to a combination of  
532 convective and shear-induced overturning. It is expected that interaction between the

533 semidiurnal tidal current and the hilly topography may generate internal waves near the  
534 buoyancy frequency (Hibiya et al., 2017), while it remains to be investigated whether  
535 the inertial motions are shear are topographically or atmospherically driven. The one-  
536 sided shear across thin-layer stratification, as inferred from observed deviation of high-  
537 N sheets from isotherms and associated with the vertical propagation direction of  
538 internal waves, may prove important for the wave breaking.

539

## 540 **5 Conclusions**

541 From the present high-resolution temperature sensor data moored up to 400 m above  
542 a hilly abyssal plain in the northeastern Pacific we find an interaction between small-  
543 scale internal wave propagation, large-scale near-inertial shear and the near-bottom  
544 water phase. In an environment where semidiurnal tidal currents dominate, 200-m shear  
545 is largest at the inertial frequency and near-bottom turbulence dissipation rates are  
546 largest at twice the inertial frequency. Due to internal wave propagation and occasional  
547 breaking, stratification in the overlying waters is organized in thin sheets, with less  
548 stratified waters in larger layers in between, but turbulent erosion occurs  
549 asymmetrically. The average amount of turbulent overturns due to internal wave  
550 breaking here and there is equal to open ocean turbulence, with intensities about 100  
551 times those of molecular diffusion. The high-frequency internal waves propagate to  
552 near the bottom and likely trigger ten times larger turbulence there as shown in time-  
553 average vertical profiles. The result is a highly variable near-bottom turbulent zone,  
554 which may be near-homogeneous over heights of less than 7 m and up to 100 m above  
555 the bottom. This near-bottom turbulence is not predominantly governed by frictional  
556 flows on a rotating sphere as in Ekman dynamics that occupy a shorter range  $O(10\text{ m})$   
557 above the bottom. Fronts occur and sudden isotherm-uplifts by solitary internal waves

558 as well. Turbulence seems shear dominated, but occurs in parallel with convection. The  
559 shear is quasi-permanent because the dominant near-circular inertial motions have a  
560 constant magnitude. It is expected that inertial shear dominates also on shorter scales  
561 (not verifiable with the present current meter data), possibly added by smaller internal  
562 wave shear. In the mean, turbulence dissipation rate exceeds the level of  $10^{-11} \text{ m}^2\text{s}^{-3}$ ,  
563 except for a 30 m thick layer around 100 mab. Given the numerous amount of hills  
564 distributed over the ocean floor, the present observations lend some support to their  
565 importance for internal wave turbulence generation in the ocean.

566  
567 Data availability. Current meter and CTD data are stored in the JPIO-databank at Geomar Kiel,  
568 Germany. The temperature sensor data are made available upon request to the author as they  
569 need to be computed from the raw data set for any given specific period.

570  
571  
572 *Acknowledgements.* I thank the master and crew of the R/V Sonne, J. Greinert and A.  
573 Vink for their pleasant contributions to the overboard sea-operations. J. Blom  
574 meticulously welded the thermistor string drums, including all of the pins. Financial  
575 support came from the Netherlands Organization for the Advancement of Science  
576 (N.W.O.), under grant number ALW-856.14.001 (JPIOceans).

577

Formatted: Indent: First line: 0 cm

Formatted: Font: (Default) Times New Roman, 11 pt, Italic

Formatted: Font: (Default) Times New Roman, 11 pt

Formatted: Font: (Default) Times New Roman, 11 pt

## APPENDIX A

578

### 579 **Thermistor string drum: A dedicated instrumented cable spool**

580 The deployment of a 1D T-sensors mooring, a thermistor string, is like most  
581 commonly done for oceanographic moorings. Through the aft A-frame the top-buoy is  
582 put first in the water whilst the ship is slowly steaming forward. The thermistor string  
583 is coupled between buoy/other instrument(s) and other instrument(s)/acoustic releases  
584 before attaching the weight that is dropped in free fall. The thermistor string is put  
585 overboard through a wide, relatively large (0.4 m) diameter pulley, about 2 m above  
586 deck, or, preferably, via a smoothly rounded gunwhale (Fig. A1). Up to 100 m length  
587 of string holding typically 100 T-sensors can be put overboard manually by one or two  
588 people. In that case, the string is laid on deck in neat long loops. The deployment of a  
589 longer length string becomes more difficult, because of the weight and drag. For such  
590 strings a 1.48 m inner diameter (1.60 m OD) 1400 pins drum is constructed to  
591 safely and fully control their overboard operation (Fig. A1). The drum dimensions fit  
592 in a sea container for easy transportation. The 0.04 m high metal pins guide the cables  
593 and separate them from the T-sensors in 'lanes', while allowing the cables to switch  
594 between lanes. The pins are screwed and welded in rows 0.027 and 0.023 m apart, the  
595 former sufficiently wide to hold the sensors. Up to 18 T-sensors can be located in one  
596 lane, before the next lane is filled. The drum has 14 double lanes and can store about  
597 230 T-sensors and 450 m of cable in one layer. The longest string deployed successfully  
598 thus far held 300 T-sensors and was 600 m long, with about one-quarter of the string  
599 doubled on the drum. The doubling did not pose a problem, the sensors were thus well  
600 separated that entanglement did not occur. For recovery, or deployment of strings  
601 holding up to 150 T-sensors, a smooth surface drum is used of the same dimensions but  
602 without pins.



603 APPENDIX B

604 **Temperature sensor data processing in weakly stratified waters**

605 High-resolution T-sensors can be used to estimate vertical turbulent exchange  
606 across density-stratified waters, under particular constraints that are more difficult to  
607 account for under weakly stratified conditions of  $N < 0.1f$ , say. As in the present data  
608 the full temperature range is only  $0.05^{\circ}\text{C}$  over 400 m, careful calibration is needed to  
609 resolve temperatures well below the 1-mK level, at least in relative precision.  
610 Correction for instrumental electronic drift of 1-2 mK/mo requires shipborne high-  
611 precision CTD knowledge of the local conditions and uses the physical condition of  
612 static stability of the ocean at time scales longer than the buoyancy scale (longer than  
613 the largest turbulent overturning timescale). CTD knowledge is also needed to use  
614 temperature data as a tracer for density variations.

615 The NIOZ4 T-sensor noise level is nominally  $<1 \times 10^{-4}^{\circ}\text{C}$  (van Haren et al., 2009;  
616 NIOZ4 is an update of NIOZ3 with similar characteristics) and thus potentially of  
617 sufficient precision. A custom-made laboratory tank can hold up to 200 T-sensors for  
618 calibration against an SBE35 Deep Ocean Standards high precision platinum  
619 thermometer to an accuracy of  $2 \times 10^{-4}^{\circ}\text{C}$  over ranges of about  $25^{\circ}\text{C}$  in the domain of  $[-$   
620  $4, +35]^{\circ}\text{C}$ . Due to drift in the NTC-resistor and other electronics of the T-sensors, such  
621 accuracy can be maintained for a period of about four weeks after aging. However, this  
622 period is generally shorter than the mooring period (of up to 1.5 years). During post-  
623 processing, sensor-drifts are corrected by subtracting constant deviations from a smooth  
624 profile over the entire vertical range and averaged over typical periods of 4-7 days.  
625 Such averaging periods need to be at least longer than the buoyancy period to guarantee  
626 that the water column is stably stratified by definition (in the absence of geothermal  
627 heating as in the present area). Conservatively, they are generally taken longer than the

628 inertial period (here: 2.5 days). In weakly stratified waters as the present observations,  
629 the effect of drift is relatively so large that the smooth polynomial is additionally forced  
630 to the smoothed CTD-profile obtained during the overlapping time-period of data  
631 collection (Fig. B1a). In the present case, this can only be done during the first few days  
632 of deployment and corrections for drift during other periods are made by adapting the  
633 local smooth polynomial with the difference of the (smooth-average) CTD-profile and  
634 the smooth polynomial of the first few days of deployment. The instrumental noise  
635 level can be verified from spectra like Fig. 2c and, alternatively, from a near-  
636 homogeneous period and layer, here between 15 and 50 mab for 1.5 h (Fig. B1b). Its  
637 standard deviation is  $4 \times 10^{-5}$  °C which is about one-third of the standard deviation of  
638 SeaBird911 CTD-T-sensor (Johnson and Garrett, 2004).

Formatted: Superscript

639 The calibrated and drift-corrected T-sensor data are transferred to Conservative  
640 (~potential) Temperature ( $\Theta$ ) values (IOC, SCOR, IAPSO, 2010), before they are used  
641 as a tracer for potential density variations  $\delta\sigma_4$ , referenced to 4000 dbar, following the  
642 constant linear relationship obtained from best-fit data using all nearby CTD-profiles  
643 over the mooring period and across the lower 400 m (Fig. B2). As temperature  
644 dominates density variations, this relationship's slope or apparent thermal expansion  
645 coefficient is  $\alpha = \delta\sigma_4/\delta\Theta = -0.223 \pm 0.005 \text{ kg m}^{-3} \text{ }^\circ\text{C}^{-1}$  (n=5). The resolvable turbulence  
646 dissipation rate threshold averaged over a 100-m vertical range is approximately  $3 \times 10^{-12}$   
647  $\text{m}^2 \text{ s}^{-3}$ .

648

649 **References**

650 Abarbanel, H. D. I., Holm, D. D., Marsden, J.E., and Ratiu, T.: Richardson number  
651 criterion for the nonlinear stability of three-dimensional stratified flow, Phys. Rev.  
652 Lett., 52, 2352-2355, 1984.

653 Alford, M. H. and Gregg, M. C.: Near-inertial mixing: Modulation of shear, strain and  
654 microstructure at low latitude, J. Geophys. Res., 106, 16,947-16,968, 2001.

655 Alford, M. H., MacKinnon, J. A., Simmons, H. L., and Nash, J. D.: Near-inertial  
656 internal gravity waves in the ocean, Ann. Rev. Mar. Sci., 8, 95-123, 2017.

657 Armi, L. and E. D'Asaro, E.: Flow structures of the benthic ocean, J. Geophys. Res.,  
658 85, 469-483, 1980.

659 Armi, L. and Millard, R. C.: The bottom boundary layer of the deep ocean. J. Geophys.  
660 Res., 81, 4983-4990, 1976.

661 Aucan, J., Merrifield, M. A., Luther, D. S., and Flament, P.: Tidal mixing events on the  
662 deep flanks of Kaena Ridge, Hawaii, J. Phys. Oceanogr., 36, 1202-1219, 2006.

663

664 Baines, P. G.: Internal tide generation by seamounts. Deep-Sea Res., 54, 1486-1508,  
665 2007.

666 Bell, T. H.: Topographically generated internal waves in the open ocean, J. Geophys.  
667 Res., 80, 320-327, 1975.

668 Boudreau, B. P. and Jørgensen, B. B. (eds): The benthic boundary layer: Transport  
669 processes and biogeochemistry, Oxford University Press, 2001.

670 Cimadoribus, A. A. and van Haren, H.: Temperature statistics above a deep-ocean  
671 sloping boundary, J. Fluid Mech., 775, 415-435, 2015.

672

Formatted: Font: (Default) Times New Roman, 12 pt

Formatted: Font: (Default) Times New Roman, 12 pt

Formatted: Justified, Indent: Left: 0 cm, Hanging: 0,63 cm, Line spacing: Double, Tab stops: 1,27 cm, Left

Formatted: Font: (Default) Times New Roman, 12 pt

Formatted: English (United States)

Formatted: Indent: Left: 0 cm, First line: 0 cm

673 Cyr, F., and van Haren, H.: Observations of small-scale secondary instabilities during  
674 the shoaling of internal bores on a deep-ocean slope, J. Phys. Oceanogr., 46, 219-  
675 231, 2016.

676 Dillon, T. M.: Vertical overturns: A comparison of Thorpe and Ozmidov length scales,  
677 J. Geophys. Res., 87, 9601-9613, 1982.

678 Ekman, V. W.: On the influence of the Earth's rotation on ocean-currents, Ark. Math.  
679 Astron. Fys., 2(11), 1-52, 1905.

680 Eriksen, C. C.: Observations of internal wave reflection off sloping bottoms, J.  
681 Geophys. Res., 87, 525-538, 1982.

682 Fritts, D. C., Wang, L., Geller, M. A., Lawrence, D. A., Werne, J., and Balsley, B. B.:  
683 Numerical modeling of multiscale dynamics at a high Reynolds number:  
684 Instabilities, turbulence, and an assessment of Ozmidov and Thorpe scales, J.  
685 Atmos. Sci., 73, 555-578, 2016.

686 Gerkema, T., Zimmerman, J. T. F., Maas, L. R. M., and van Haren, H.: Geophysical  
687 and astrophysical fluid dynamics beyond the traditional approximation, Rev.  
688 Geophys., 46, RG2004, doi:10.1029/2006RG000220, 2008.

689 Garrett, C. and Munk, W.: Oceanic mixing by breaking internal waves, Deep-Sea Res.,  
690 19, 823-832, 1972.

691 Gregg, M. C.: Scaling turbulent dissipation in the thermocline, J. Geophys. Res., 94,  
692 9686-9698, 1989.

693 Hibiya, T., Ijichi, T., and Robertson, R.: The impacts of ocean bottom roughness and  
694 tidal flow amplitude on abyssal mixing, J. Geophys. Res., 122, 5645-5651,  
695 doi:10.1002/2016JC012564, 2017.

696 Hollister, C. D. and McCave, I. N.: Sedimentation under deep-sea storms, Nature, 309,  
697 220-225, 1984.

- Formatted: English (United States)
- Formatted: Font: 12 pt, English (United States)
- Formatted: English (United States)
- Formatted: Font: 12 pt, English (United States)
- Formatted: Indent: Left: 0 cm, Hanging: 0,63 cm, Line spacing: Double
- Formatted: Font: 12 pt
- Formatted: Font: 12 pt
- Formatted: Font: 12 pt, English (United States)
- Formatted: Font: 12 pt, English (United States)

698 IOC, SCOR, IAPSO: The international thermodynamic equation of seawater – 2010:  
699 Calculation and use of thermodynamic properties, Intergovernmental  
700 Oceanographic Commission, Manuals and Guides No. 56, UNESCO, Paris, France,  
701 2010.

702 [Johnson, H. I. and Garrett, C.: Effects of noise on Thorpe scales and run lengths, J.](#)  
703 [Phys. Oceanogr., 34, 2359-2372, 2004.](#)

704 Lazier, J. R. N.: Temporal changes in some fresh water temperature structures, J. Phys.  
705 Oceanogr., 3, 226-229, 1973.

706 LeBlond, P. H. and Mysak, L. A.: Waves in the Ocean, Elsevier, New York, 1978.

707 Li, S. and Li, H.: Parallel AMR code for compressible MHD and HD equations, T-7,  
708 MS B284, Theoretical division, Los Alamos National Laboratory,  
709 <http://math.lanl.gov/Research/Highlights/amrmhd.shtml>, 2006.

710 Lochte, K.: Bacterial Standing Stock and Consumption of Organic Carbon in the  
711 Benthic Boundary Layer of the Abyssal North Atlantic, In: Rowe, G. T. and  
712 Pariente, V. (eds), Deep-Sea Food Chains and the Global Carbon Cycle, Kluwer,  
713 Dordrecht, 1-10, 1992.

714 Mater, B. D., Venayagamoorthy, S. K., St. Laurent, L., and Moum, J. N.: Biases in  
715 Thorpe scale estimates of turbulence dissipation. Part I: Assessments from large-  
716 scale overturns in oceanographic data, J. Phys. Oceanogr., 45, 2497-2521, 2015.

717 Matsumoto, Y. and Hoshino, M.: Onset of turbulence by a Kelvin-Helmholtz vortex,  
718 Geophys. Res. Lett., 31, L02807, doi:10.1029/2003GL018195, 2004.

719 Mensah, V., Le Menn, M., and Morel, Y.: Thermal mass correction for the evaluation  
720 of salinity, J. Atmos. Ocean. Tech., 26, 665-672, 2009.

721 Morozov, E. G.: Semidiurnal internal wave global field, Deep-Sea Res. I, 42, 135-148,  
722 1995.

723 -  
724 Morozov, E. G.; Internal Tides: Observations, analysis and modeling: A Global View,  
725 Springer, Berlin (D), 2018.  
726 Nikurashin, M., Ferrari, R., Grisouard, N., and K. Polzin, K.: The impact of finite-  
727 amplitude bottom topography on internal wave generation in the southern ocean, J.  
728 Phys. Oceanogr., 44, 2938-2950, 2014.  
729 Oakey, N. S.: Determination of the rate of dissipation of turbulent energy from  
730 simultaneous temperature and velocity shear microstructure measurements, J. Phys.  
731 Oceanogr., 12, 256-271, 1982.  
732 Osborn, T. R.: Estimates of the local rate of vertical diffusion from dissipation  
733 measurements, J. Phys. Oceanogr., 10, 83-89, 1980.  
734 Phillips, O. M.: On spectra measured in an undulating layered medium, J. Phys.  
735 Oceanogr., 1, 1-6, 1971.  
736 Piera, H. I., Roget, E., and Catalan, J.: Patch identification in microstructure profiles: A  
737 method based on wavelet denoising and Thorpe displacement analysis, J. Atmos.  
738 Oceanic Technol., 19, 1390-1402, 2002.  
739 Smith, W. H. F. and Sandwell, D. T.: Global seafloor topography from satellite  
740 altimetry and ship depth soundings, Science, 277, 1957-1962, 1997.  
741 St. Laurent, L. C., Garabato, A. C. N., Ledwell, J. R., Thurnherr, A. M., Toole, J. M.,  
742 and Watson, A. J.: Turbulence and diapycnal mixing in Drake Passage, J. Phys.  
743 Oceanogr., 42, 2143-2152, 2012  
744 Tennekes, H. and Lumley, J. L.: A first course in Turbulence, MIT Press, Cambridge,  
745 1972.  
746 Thorpe, S. A.: Turbulence and mixing in a Scottish loch, Phil. Trans. Roy. Soc. Lond.  
747 A, 286, 125-181, 1977.

Formatted: Justified, Line spacing: Double

Formatted: Font: (Default) Times New Roman, 12 pt

Formatted: Font: (Default) Times New Roman, 12 pt

Formatted: Font: 12 pt

748 Thorpe, S. A.: Benthic observations on the Madeira abyssal plain: *Fronts, J. Phys.*  
749 *Oceanogr.*, 13, 1430-1440, 1983.

750 Thorpe, S. A.: Models of energy loss from internal waves breaking in the ocean, *J. Fluid*  
751 *Mech.*, 836, 72-116, 2018.

752 van Haren, H.: Inertial and tidal shear variability above Reykjanes Ridge, *Deep-Sea*  
753 *Res. I*, 54, 856-870, 2007.

754 van Haren, H.: Impressions of the turbulence variability in a weakly stratified, flat-  
755 bottom deep-sea 'boundary layer', *Dyn. Atmos. Oceans*, 69, 12-25, 2015.

756 van Haren, H. and L. Gostiaux, L.: High-resolution open-ocean temperature spectra, *J.*  
757 *Geophys. Res.*, 114, C05005, doi:10.1029/2008JC004967, 2009.

758 van Haren, H. and Gostiaux, L.: Detailed internal wave mixing above a deep-ocean  
759 slope, *J. Mar. Res.*, 70, 173-197, 2012.

760 van Haren, H. and Millot, C.: Rectilinear and circular inertial motions in the Western  
761 Mediterranean Sea, *Deep-Sea Res. I*, 51, 1441-1455, 2004.

762 van Haren, H. and Millot, C.: Gyroscopic waves in the Mediterranean Sea, *Geophys.*  
763 *Res. Lett.*, 32, L24614, doi:10.1029/2005GL023915, 2005.

764 van Haren, H., Laan, M., Buijsman, D.-J., Gostiaux, L., Smit, M. G., and Keijzer, E.:  
765 NIOZ3: independent temperature sensors sampling yearlong data at a rate of 1 Hz,  
766 *IEEE J. Ocean. Eng.*, 34, 315-322, 2009.

767

768 van Haren, H., Morozov, E., Gostiaux, L., and Tarakanov, R.: Convective and shear-  
769 induced turbulence in the deep Kane Gap, *J. Geophys. Res.*, 118, 5924-5930,  
770 doi:10.1002/2013JC009282, 2013.

Formatted: Font: 12 pt

Formatted: Indent: Left: 0 cm, Hanging: 0,63 cm, Line spacing: Double

771 van Haren, H., Gostiaux, L., Morozov, E., and Tarakanov, R.: Extremely long Kelvin-  
772 Helmholtz billow trains in the Romanche Fracture Zone, Geophys Res. Lett., 41,  
773 8445-8451, doi:10.1002/2014GL062421, 2014.

774 Wimbush, M.: Temperature gradient above the deep-sea floor, Nature, 227, 1041-1043,  
775 1970.

776

- Formatted: Font: 12 pt



777 **Figure 1.** Bathymetry map of the tropical Northeast Pacific based on the [Topo 9.1b](#)  
778 ~~9.1 ETOPO-1~~ version of satellite altimetry-derived data by Smith and Sandwell  
779 (1997). The black dot in the lower panel indicates mooring and CTD positions. Note  
780 the different colour ranges between the panels.

781

782 **Figure 2.** Stratification and spectral overview. **(a)** Vertical profiles of buoyancy  
783 frequency scaled with the local horizontal component of the Coriolis parameter  $f_h$   
784 and smoothed over 50 dbar (~50 m), from all five CTD-stations to within 1 km from  
785 the mooring. The blue, green and red profiles are made around the time of mooring  
786 deployment. **(b)** Weakly smoothed (10 degrees of freedom, dof) spectra of kinetic  
787 energy (upper current meter; green) and current difference (between upper and  
788 middle current meters; light-blue). In red and purple the spectra of 150 s sub-  
789 sampled time series of 100 m vertically averaged turbulence dissipation rates for  
790 lower (7-107 m above the bottom, mab) and upper (307-407 mab) T-sensor data  
791 segments, respectively. The inertial frequency  $f$ ,  $f_h$  including several higher  
792 harmonics, buoyancy frequency  $N$  incl. range, and the semidiurnal lunar tidal  
793 frequency  $M_2$  are indicated.  $N_{max}$  indicates the maximum small-scale buoyancy  
794 frequency. **(c)** Weakly smoothed (10 dof) spectra of 2 s sub-sampled temperature  
795 data from 3 depths representing upper, middle and lower levels. For reference,  
796 several slopes with frequency are indicated.

797

798 **Figure 3.** One day sample detail of moored temperature observations during relatively  
799 calm conditions (on the day of calibration in the beginning of the record). **(a)**  
800 Conservative Temperature. The black contour lines are drawn every  $0.005^\circ\text{C}$ . At  
801 the top from left to right, two time references indicate the mean (purple bar) and

802 shortest (green bar) buoyancy periods found in this data-detail. Values for time-  
803 depth-range-mean parameters are given of buoyancy Reynolds number (light-  
804 blue), buoyancy frequency (blue), turbulence dissipation rate (red) and turbulent  
805 eddy diffusivity (black). Errors for the latter two are to within a factor of 2,  
806 approximately. (b) Logarithm of small-scale (2 dbar) buoyancy frequency from  
807 reordered temperature profiles. The black isotherms are reproduced from panel a.  
808 (c) Thorpe displacements between raw-(panel a.) and reordered T-profiles. (d)  
809 Logarithm of turbulence dissipation rate.

810

811 **Figure 4.** Magnifications of Fig. 3a using different colour ranges but maintaining the 5  
812 mK distance between isotherms. (a) Upper 100 m of temperature sensor range ('T-  
813 range'). (b) Approximately middle 100 m of T-range. (c) Bottom 100 m of T-range;  
814 note the entire colour range extending over 1 mK only. (d) Time series of logarithm  
815 of vertical-mean turbulence dissipation rates from Fig. 3d for the panels a,b,c  
816 labelled u,m,b, respectively.

817

818 **Figure 5.** As Fig. 3 with identical colour ranges, but for a one-day period with more  
819 intense turbulence especially near the bottom.

820

821 **Figure 6.** As Fig. 4, but associated with Fig. 5 and using different colour ranges.

822

823 **Figure 7.** As Fig. 3 with identical colour ranges, but for a two-day period with  
824 occasional long shear turbulence.

825

826 **Figure 8.** As Fig. 4, but associated with Fig. 7 and using different colour ranges.

827

828 **Figure 9.** As Fig. 3 with identical colour ranges, but for a two-day period with some  
829 intense convective turbulence also near the bottom.

830

831 **Figure 10.** As Fig. 4, but associated with Fig. 9 and using different colour ranges.

832

833 **Figure 11.** Profiles of turbulence parameters from entire-record time-averaged  
834 estimates using 1-day drift-corrected, 150 s sub-sampled moored temperature data.

835 (a) Logarithm of dissipation rate. (b) Logarithm of eddy diffusivity. (c) Logarithm  
836 of small-scale (2 dbar) buoyancy frequency from the T-sensors (black) with for  
837 comparison the mean of the five CTD-profiles smoothed over 50 dbar vertical  
838 intervals from Fig. 2a (red). The green dashed curves indicate the minimum (to the  
839 left of the f-line) and maximum (to the right of the N-profile) inertio-gravity wave  
840 bounds for meridional internal wave propagation (see text). (d) Pdf of the ‘bottom  
841 boundary layer height’, the level of the first passage of threshold  $N > 3 \times 10^{-4} \text{ s}^{-1}$   
842 indicating the stratification capping the ‘near-homogeneous’ layer from the bottom  
843 upward. Two peaks are visible, one near 10 mab attributable to bottom friction,  
844 another around 65 mab attributable to internal wave-induced turbulence.

845

846 **Fig. A1.** Photo of thermistor string deployment using the instrumented cable spooling  
847 drum onboard R/V Sonne.

848

849 **Fig. B1.** Conservative Temperature profiles with depth over the lower 400 mab. (a)  
850 One-day mean moored sensor data, raw data after calibration (thin black line,  
851 yellow-filled) and smooth high-order polynomial fit (thick black solid line). In red

852 are three CTD-profiles within 1 km from the mooring during the first days of  
853 deployment (two solid profiles on day 80/81 coincide in time with moored data  
854 mean), in blue-dashed are two CTD-profiles after recovery of the mooring. The  
855 mean of the two solid red profiles is given by the red/dash-dot profile, 0.015 °C off-  
856 set for clarity, with its smooth high-order polynomial fit in light-blue to which the  
857 moored data are corrected. (b) Standard deviation of 1.5 h T-sensor data between  
858 days 80.26 and 80.32, when the layer between about 15 and 50 mab is near-  
859 homogeneous. The sensors' noise level is indicated by the purple line.

860

861 **Fig. B2.** Lower 400 m of five CTD-profiles obtained near the T-sensor mooring. Red  
862 data are from around the beginning of the moored period, blue from after recovery.  
863 (a) Conservative Temperature. (b) Absolute Salinity with x-axis range matching the  
864 one in a. in terms of equivalent relative contributions to density variations. The noise  
865 level is larger than for temperature. (c) Density anomaly referenced to 4000 dbar.  
866 (d) Density anomaly – Conservative Temperature relationship ( $\delta\sigma_4 = \alpha\delta\Theta$ ). The  
867 data yielding two representative slopes after linear fit are indicated (the mean of 5  
868 profiles gives  $\langle\alpha\rangle = -0.223\pm 0.005 \text{ kg m}^{-3} \text{ }^\circ\text{C}^{-1}$ ).

869
